# Supplementary material
Source: PubMed Central journal article supplement (PMC6868471)
Supplement: DB190204SupplementaryData1.pdf [file DB190204SupplementaryData1.pdf]

SUPPLEMENTARY DATA

**Supplementary Figure 1. Principle component analysis of RNAseq data from control, early DN, and advanced DN samples.**

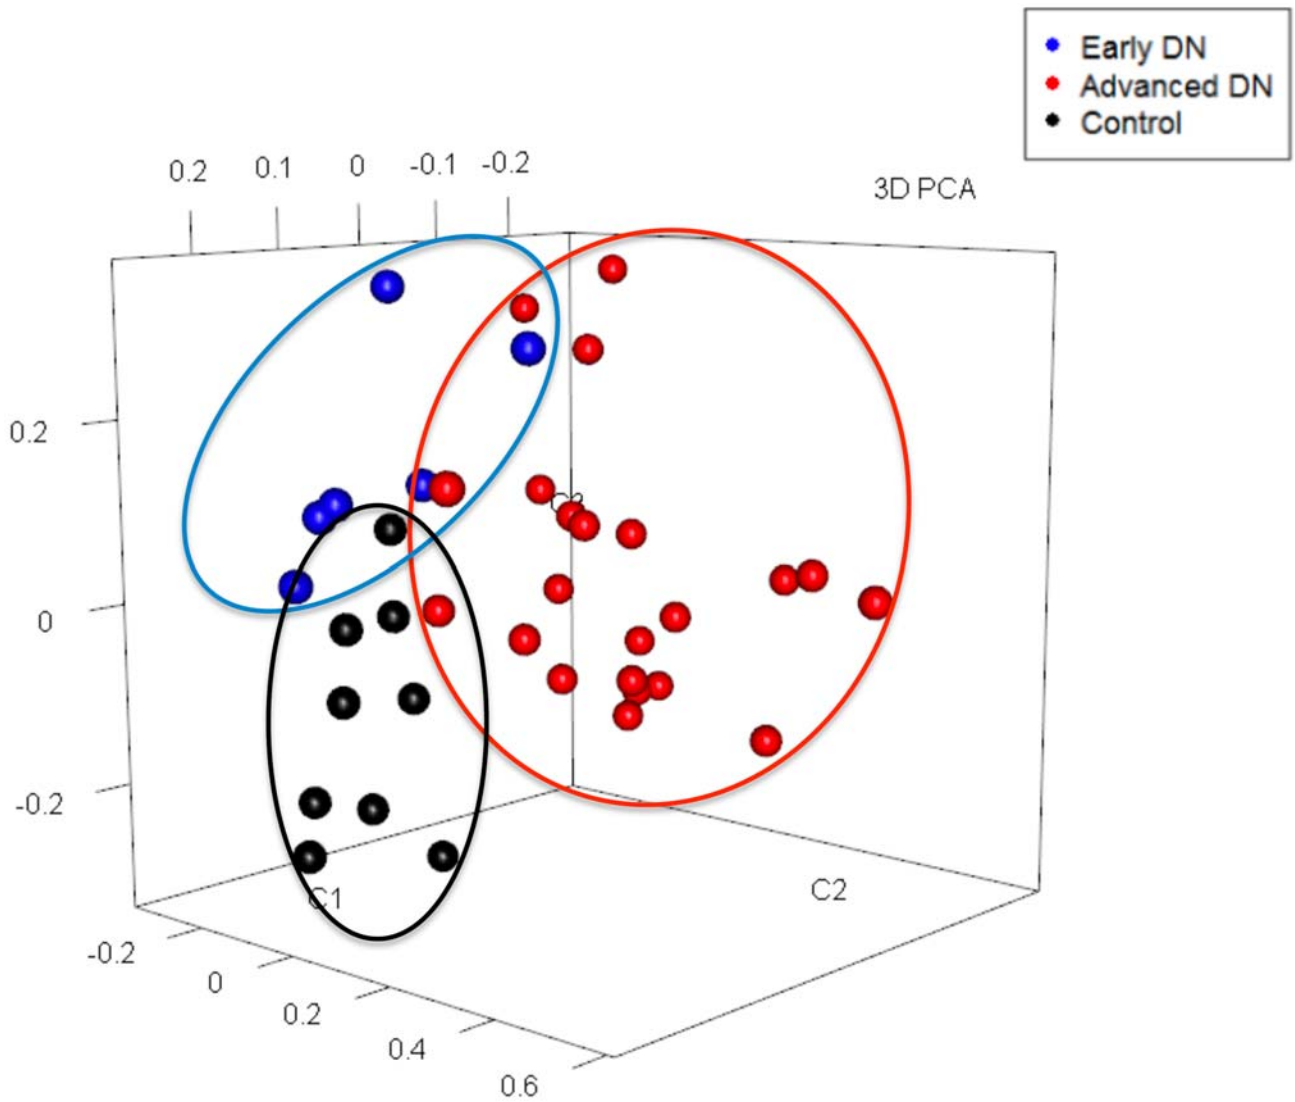

SUPPLEMENTARY DATA

**Supplementary Figure 2. Top 20 enriched pathways for all DEGs between early DN vs. control.** The number of upregulated and downregulated DEGs are indicated on the left of the bars in blue, and top 5 genes in each pathway are indicated.

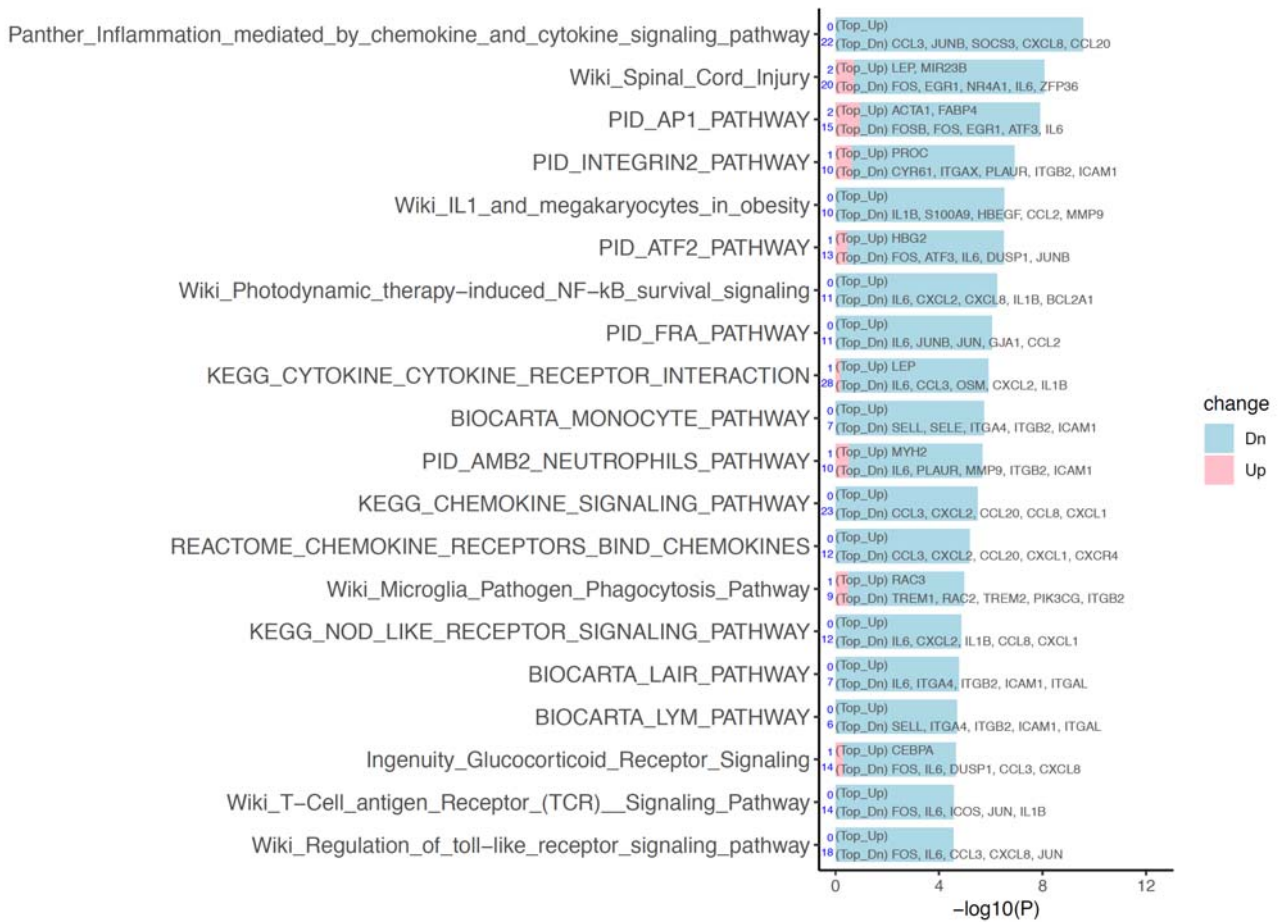

SUPPLEMENTARY DATA

**Supplementary Figure 3. Top 20 enriched pathways for all DEGs between advanced DN vs. early DN.** The number of upregulated and downregulated DEGs are indicated on the left of the bars in blue, and top 5 genes in each pathway are indicated.

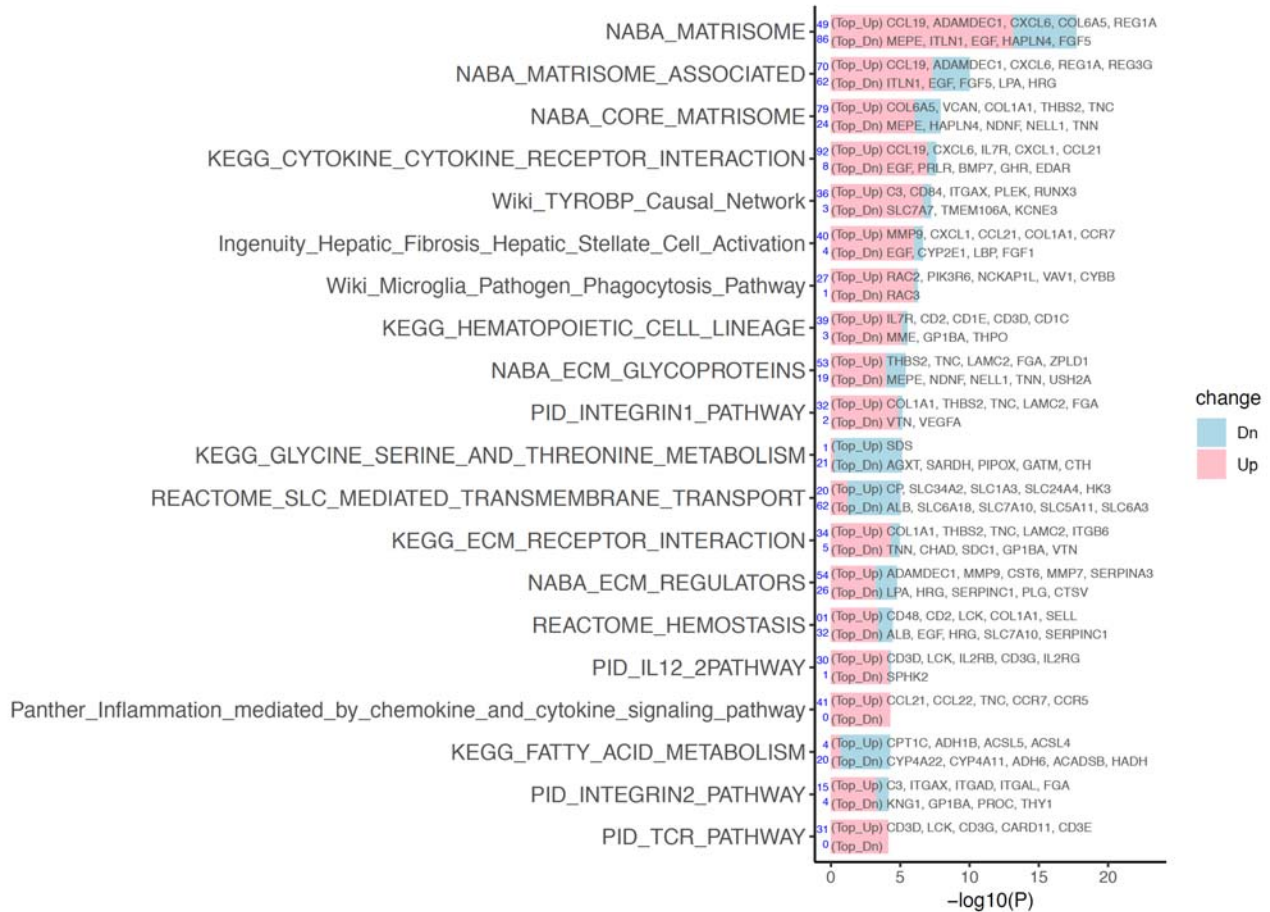

SUPPLEMENTARY DATA

**Supplementary Figure 4. Top 20 enriched pathways genes that correlated with eGFR in DN patients.** The number of upregulated and downregulated genes are indicated on the left of the bars in blue, and top 5 genes in each pathway are indicated.

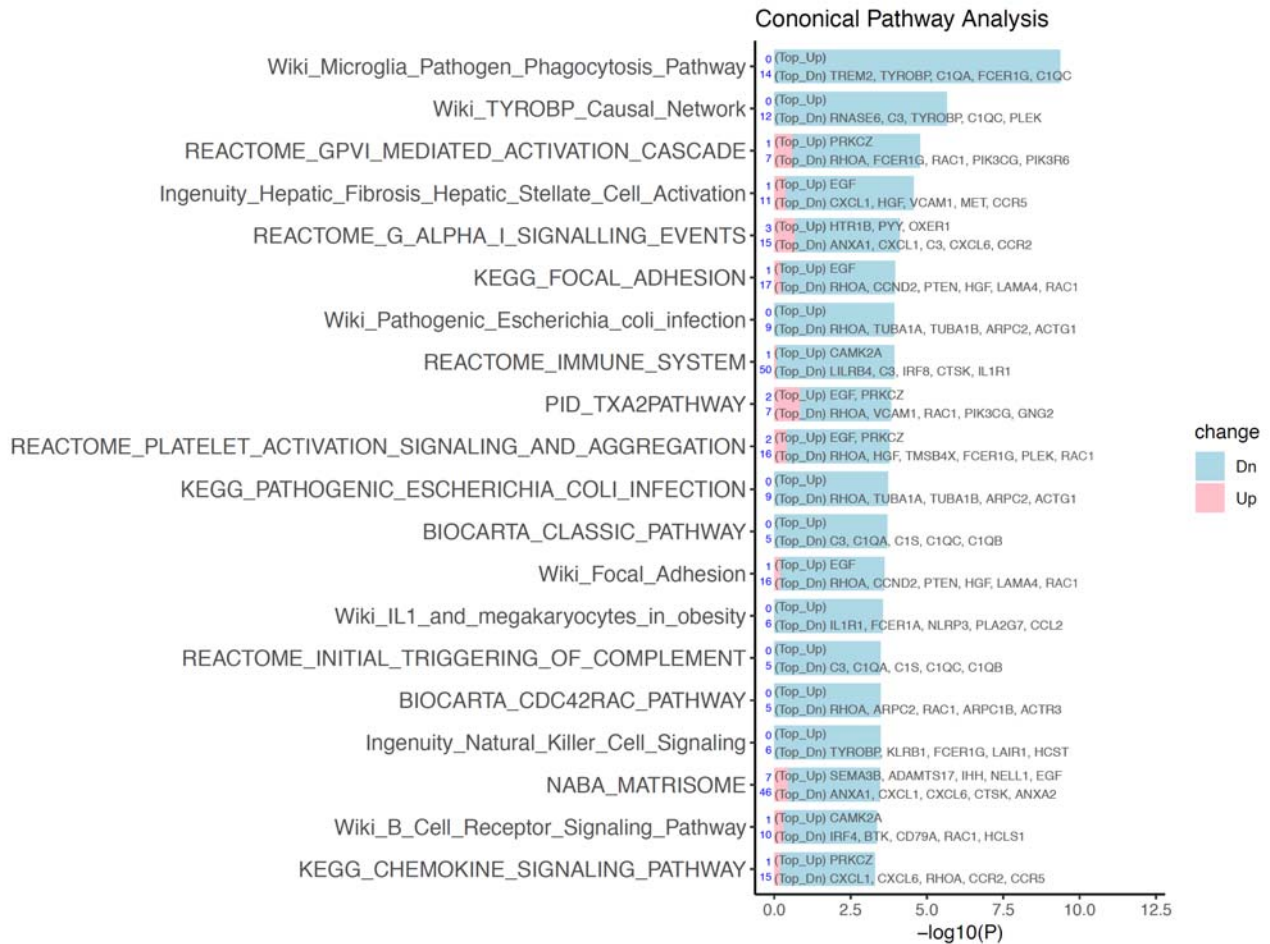

SUPPLEMENTARY DATA

**Supplementary Figure 5. GO pathway analysis for differentially expressed genes for early DN vs. control with adjustment of estimated cell populations.** The number of upregulated and downregulated genes are indicated on the left of the bars in blue, and top 5 genes in each pathway are indicated.

**Early DN vs. control:**

| Gene expression change | Unadjusted Early DN vs. Ctrl. DEGs (#) | Adjusted Early DN vs. Ctrl. DEGs (#) | # overlapping DEGs | % overlapping DEGs |
|------------------------|----------------------------------------|--------------------------------------|--------------------|--------------------|
| up                     | 303                                    | 310                                  | 267                | 0.8612             |
| down                   | 445                                    | 405                                  | 383                | 0.9457             |

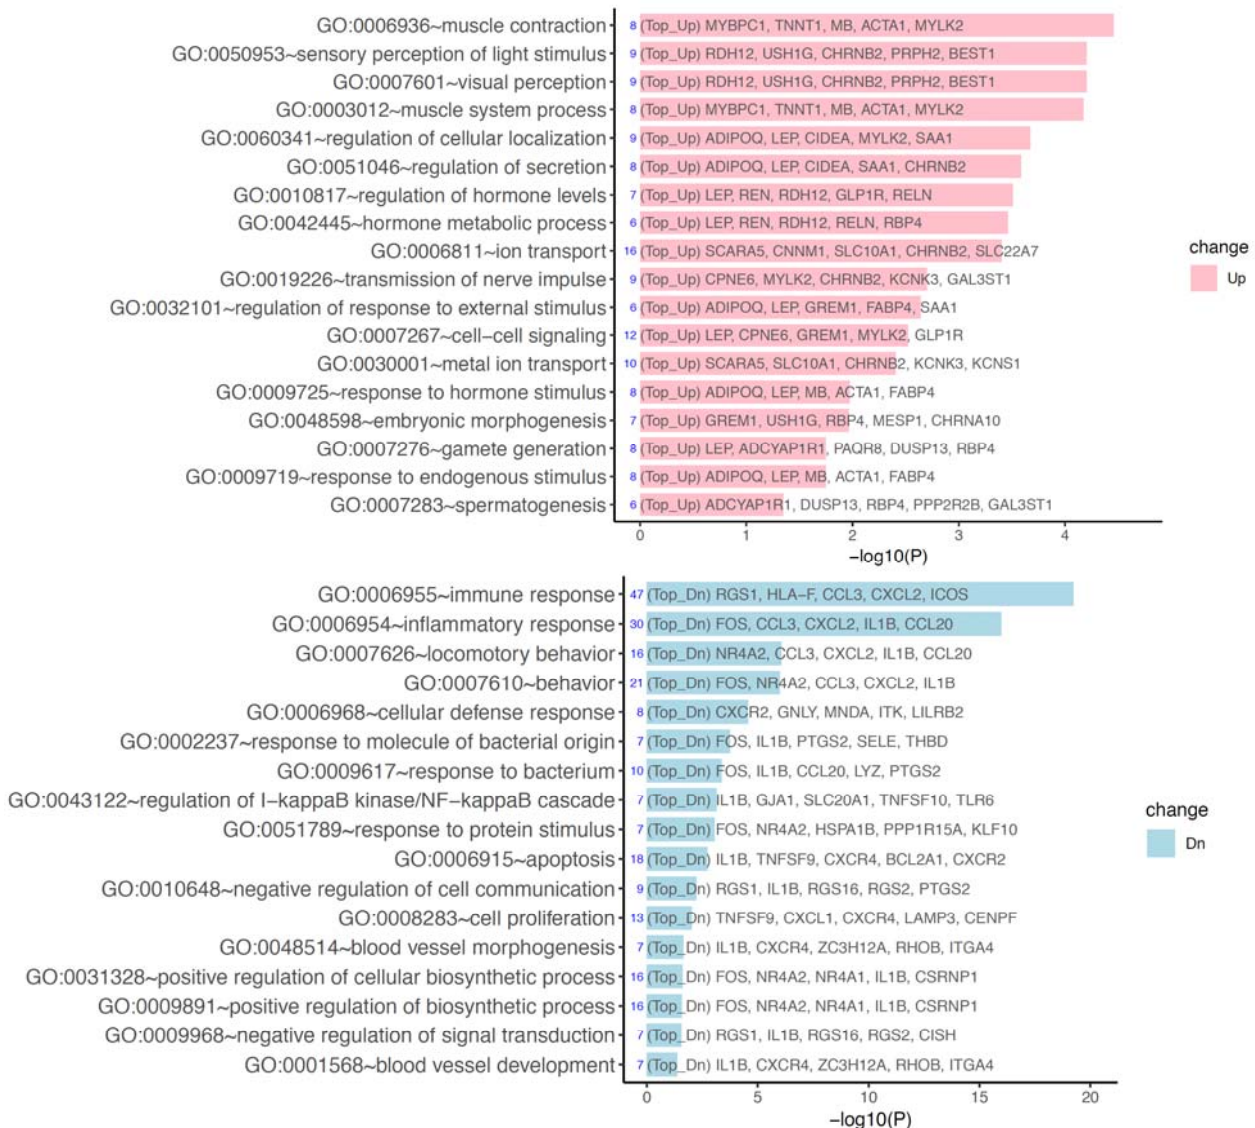

SUPPLEMENTARY DATA

**Supplementary Figure 6. GO pathway analysis for differentially expressed genes for advanced vs. early DN with adjustment of estimated cell populations.** The number of upregulated and downregulated genes are indicated on the left of the bars in blue, and top 5 genes in each pathway are indicated.

**Advanced vs. Early DN:**

| Gene expression change | Unadjusted Early DN vs. Ctrl. DEGs (#) | Adjusted Early DN vs. Ctrl. DEGs (#) | # overlapping DEGs | % overlapping DEGs |
|------------------------|----------------------------------------|--------------------------------------|--------------------|--------------------|
| up                     | 1903                                   | 1741                                 | 1714               | 0.9845             |
| down                   | 1783                                   | 1488                                 | 1421               | 0.9550             |

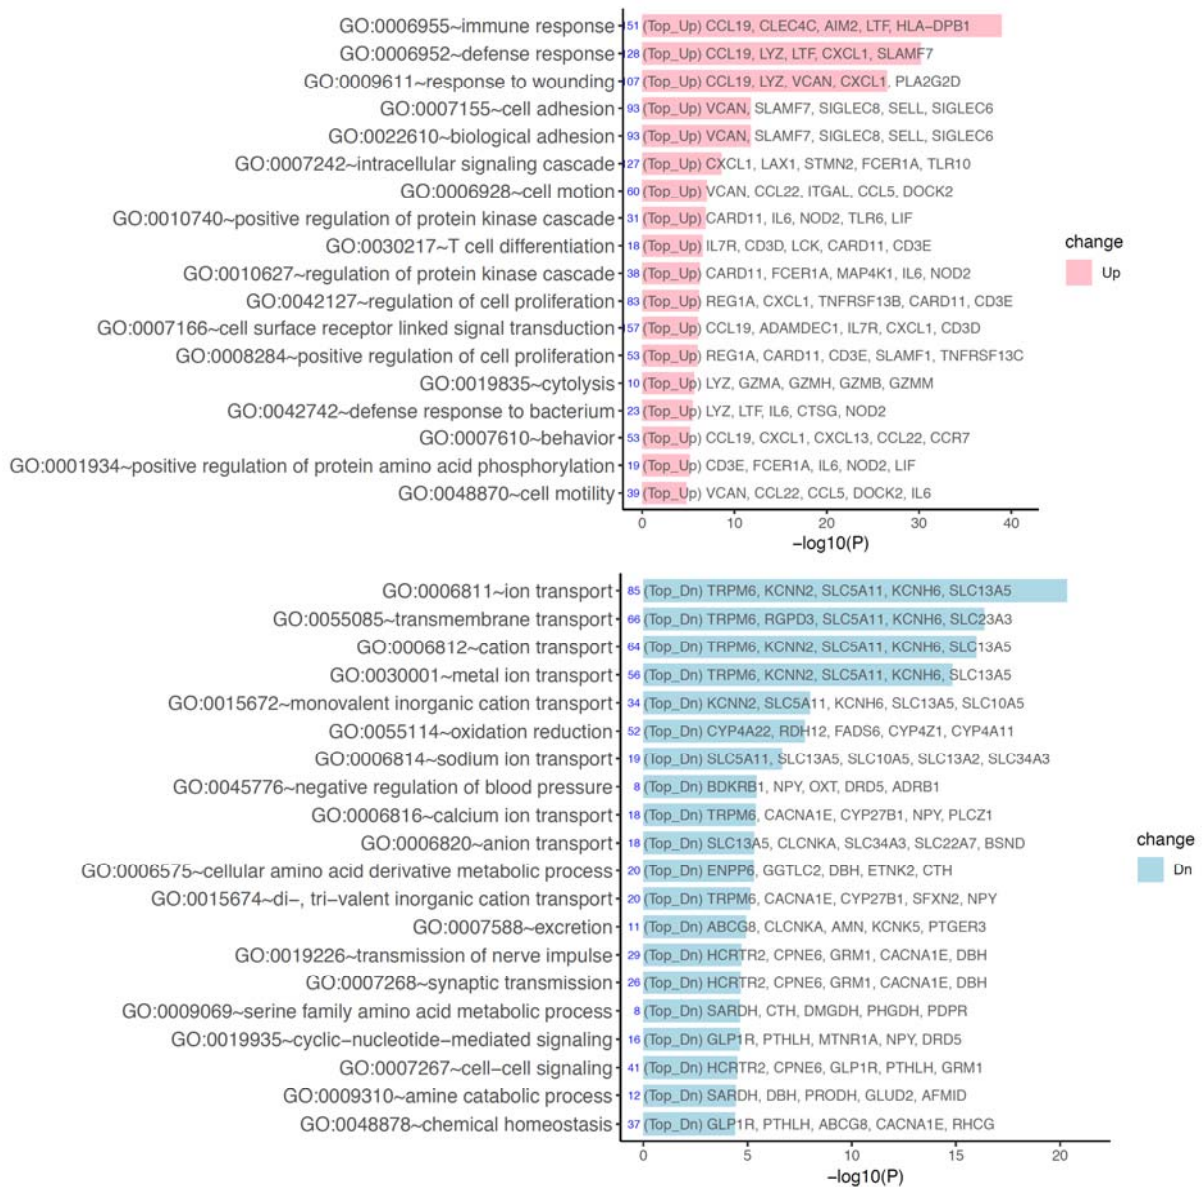

SUPPLEMENTARY DATA

**Supplementary Figure 7. Immunofluorescence staining of RBP4 and GLP1R in early DN kidneys.** Both RBP4 and GLP1R were expressed in the proximal tubules of early DN patient kidneys, which co-localized with AQP1. Scale bar indicates 50 microns.

**RBP4, AQP1, DAPI**

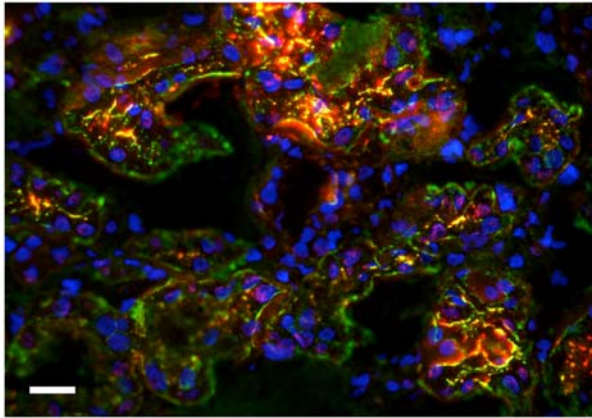

**GLP1R, AQP1, DAPI**

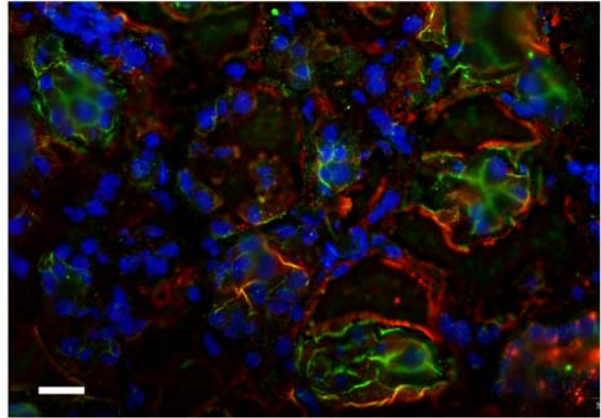

SUPPLEMENTARY DATA

**Supplementary Figure 8. Semi-quantification of immunostaining in human kidneys (in Figure 8).** Average scores of immunostaining. N=5 per group, \*P<0.05, \*\*\*P<0.001, \*\*\*\*P<0.0001 vs. control; ###P<0.001 and ####P<0.0001 vs. Early DN.

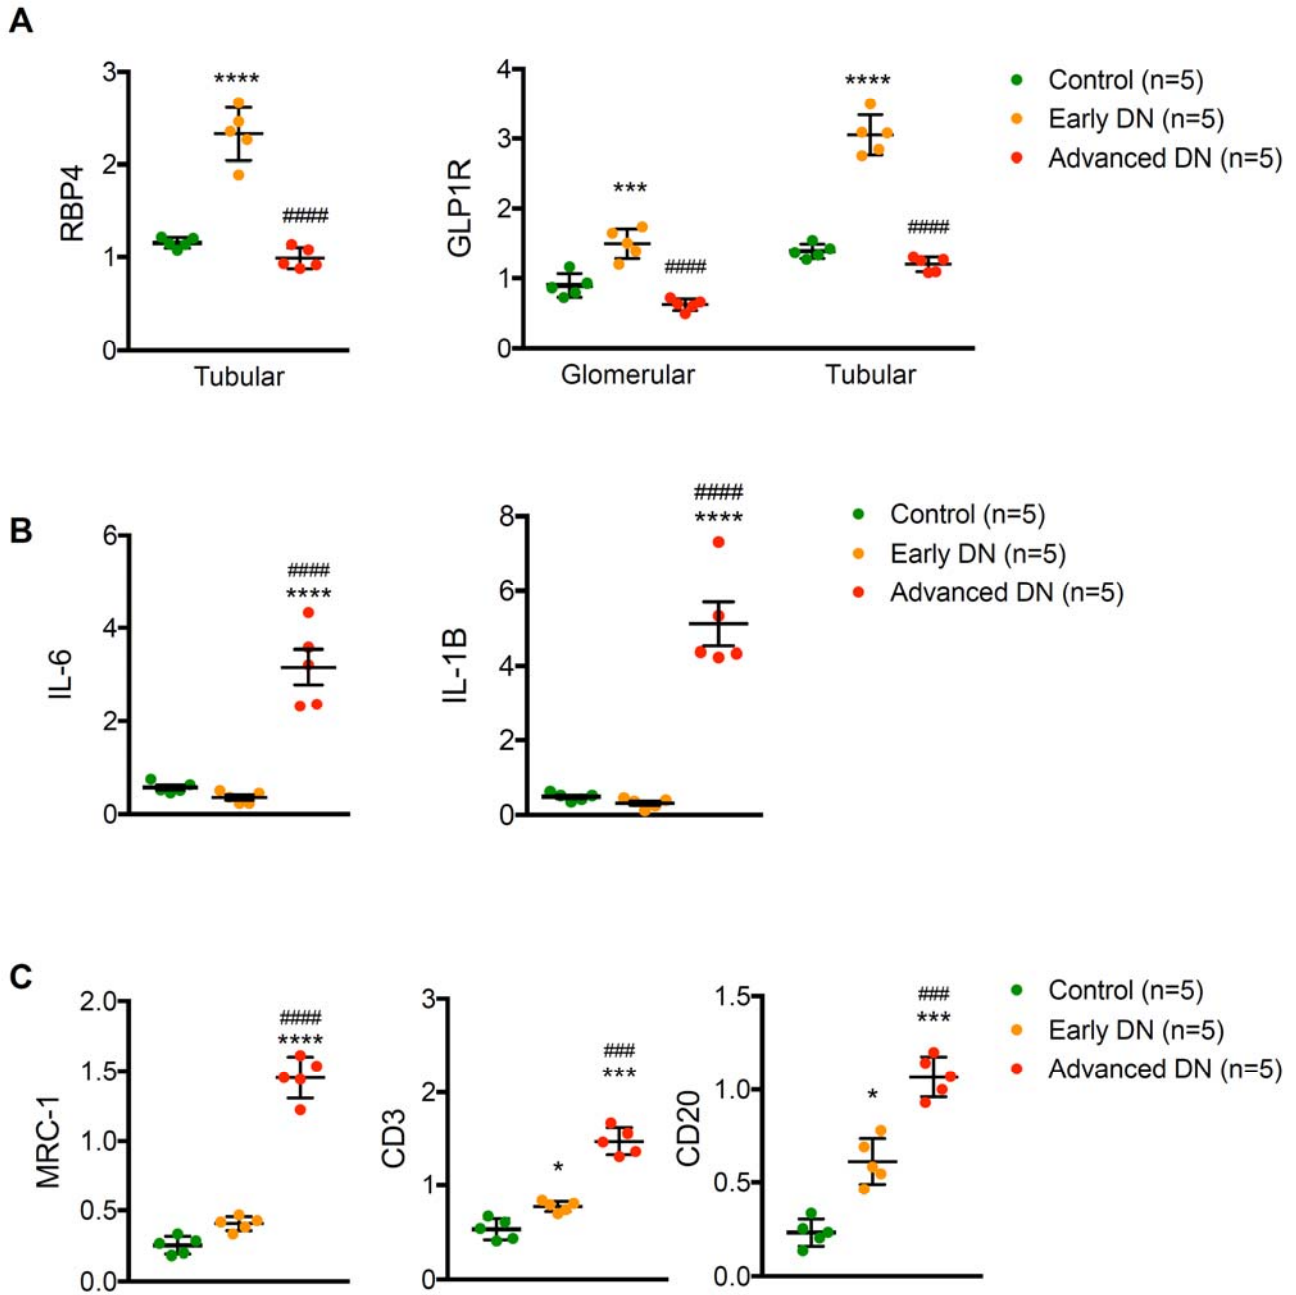



SUPPLEMENTARY DATA

**Supplementary Table 1. Demographic and clinical characteristics of kidney biopsy patients**

| Baseline characteristics             | Control (n=9) | Early DN (n=6) | Advanced DN (n=22) | P      |
|--------------------------------------|---------------|----------------|--------------------|--------|
| Male/female (% male)                 | 7/2 (77.7)    | 5/1 (83.3)     | 13/9 (59.1)        |        |
| Age (yr)                             | 60.89±2.85    | 50.67 ± 3.547  | 53.18 ± 2.467      | 0.6261 |
| Diabetes duration (yr)               | 0             | 9.417 ± 2.622  | 11.41 ± 1.15       | 0.4474 |
| Body mass index (kg/m <sup>2</sup> ) | 23.38±1.39    | 24.68 ± 1.243  | 25.57 ± 0.697      | 0.5523 |
| Glycated hemoglobin A1c (%)          | 5.68±0.29     | 7.317 ± 0.488  | 8.455 ± 0.660      | 0.3911 |
| Systolic blood pressure (mm/Hg)      | 128.0±1.80    | 132.7 ± 6.443  | 141.6 ± 4.38       | 0.3348 |
| Diastolic blood pressure (mm/Hg)     | 75.67±2.26    | 80.83 ± 2.664  | 84.41 ± 2.49       | 0.4819 |
| UACR(mg/g)                           | 16.88±0.69    | 130.2 ± 23.68  | 4444 ± 674.1       | 0.0028 |
| Total urinary protein (g/24hr)       | 0.09±0.01     | 0.22 ± 0.038   | 6.11 ± 0.967       | 0.0042 |
| Serum albumin (g/L)                  | 39.33±2.65    | 43.67 ± 1.648  | 34.64 ± 1.727      | 0.0146 |
| Serum creatinine (mg/dl)             | 1.03±0.09     | 0.7433 ± 0.036 | 1.289 ± 0.100      | 0.0096 |
| Serum BUN (mg/dl)                    | 5.27±0.25     | 12.17 ± 1.001  | 22.37 ± 1.96       | 0.0133 |
| eGFR (ml/min)                        | 87.33±9.84    | 117.7 ± 8.624  | 63.79 ± 5.765      | 0.0001 |

Data are presented as n or means ± SD. eGFR was calculated using the Modification of Diet in Renal Disease formula. The two-sided unpaired t-test was used to determine the statistical significance between groups for age, diabetes duration, body mass index, glycated hemoglobin A1c, systolic blood pressure, diastolic blood pressure, Urinary albumin-to-creatinine ratio (UACR), total urinary protein, serum creatinine, serum BUN, and estimated glomerular filtration rate (eGFR).

SUPPLEMENTARY DATA

**Supplementary Table 2. Renal pathologic characteristics of patients with early and advanced diabetic nephropathy**

| Histological quantification                 | Early DN (n=4) | Advanced DN (n=22) | P       |
|---------------------------------------------|----------------|--------------------|---------|
| Segmental glomerulosclerosis (%)            | 0±0            | 8.943±0.100        | 0.0004  |
| Global glomerulosclerosis (%)               | 2.381±0.048    | 21.603±0.187       | 0.0005  |
| Interstitial fibrosis & tubular atrophy (%) | 8.750±0.048    | 44.773±0.173       | <0.0001 |
| Acute tubular injury (%)                    | 10±0.115       | 10.682±0.097       | 0.9171  |
| Arteriosclerosis                            | 1.250±0.5      | 1.182±0.395        | 0.8097  |

Histological changes were scored according to the consensus classification of DN by the Renal Pathology Society (18). Data are presented as means ± SD for percentages observed for all except arteriosclerosis. Arteriosclerosis: 0 = no intimal thickening; 1 = intimal thickening less than the thickness of media; 2 = Intimal thickening greater than the thickness of media. The t-test was applied for statistical significance.

SUPPLEMENTARY DATA

**Supplementary Table 3. Comparison with previously published RNA-seq datasets**

**Comparison of DEGs with GSE96804:**

| Gene expression change | DEG count (Advanced DN vs. Control) | DEG count in GSE96804 | Overlapping DEGs (#) | Overlapping DEGs (%) |
|------------------------|-------------------------------------|-----------------------|----------------------|----------------------|
| Up                     | 1771                                | 463                   | 139                  | 0.3002               |
| Down                   | 1676                                | 890                   | 317                  | 0.3562               |

**Comparison of DEGs with GSE30122 (Glomerular compartment):**

| Gene expression change | DEG count (Advanced DN vs. Control) | DEG count in GSE30122 | Overlapping DEGs (#) | Overlapping DEGs (%) |
|------------------------|-------------------------------------|-----------------------|----------------------|----------------------|
| Up                     | 1771                                | 491                   | 196                  | 0.3992               |
| Down                   | 1676                                | 822                   | 109                  | 0.1326               |

**Comparison of DEGs with GSE30122 (Tubular compartment):**

| Gene expression change | DEG count (Advanced DN vs. Control) | DEG count in GSE30122 | Overlapping DEGs (#) | Overlapping DEGs (%) |
|------------------------|-------------------------------------|-----------------------|----------------------|----------------------|
| Up                     | 1771                                | 935                   | 382                  | 0.3422               |
| Down                   | 1676                                | 401                   | 158                  | 0.3441               |

**Comparison of GO pathways with GSE96804:**

| Gene expression change | Pathways (Advanced DN vs. Control) | Pathways in GSE96804 | Overlapping Pathways (#) | Overlapping Pathways (%) |
|------------------------|------------------------------------|----------------------|--------------------------|--------------------------|
| Up_GO                  | 540                                | 135                  | 79                       | 0.5852                   |
| Down_GO                | 479                                | 210                  | 136                      | 0.6476                   |

**Comparison of GO pathways with GSE30122 (Glomerular compartment):**

| Gene expression change | Pathways (Advanced DN vs. Control) | Pathways in GSE30122 | Overlapping Pathways (#) | Overlapping Pathways (%) |
|------------------------|------------------------------------|----------------------|--------------------------|--------------------------|
| Up_GO                  | 540                                | 247                  | 196                      | 0.7935                   |
| Down_GO                | 479                                | 142                  | 41                       | 0.2887                   |

**Comparison of GO pathways with GSE30122 (Tubular compartment):**

| Gene expression change | Pathways (Advanced DN vs. Control) | Pathways in GSE30122 | Overlapping Pathways (#) | Overlapping Pathways (%) |
|------------------------|------------------------------------|----------------------|--------------------------|--------------------------|
| Up_GO                  | 540                                | 317                  | 193                      | 0.6088                   |
| Down_GO                | 479                                | 100                  | 62                       | 0.6200                   |
